# Supplementary material for: Demonstration of a common indole-based aromatic core in natural and synthetic eumelanins by solid-state NMR
Source: Royal Society of Chemistry journal article supplement (doi:10.1039/c4ob01066c), 2014-01-01
Supplement: c4ob01066c1.pdf [file c4ob01066c1.pdf]

**Supporting Information**

**Demonstration of a Common Indole-based Aromatic Core in  
Natural and Synthetic Eumelanins by Solid-State NMR**

*Subhasish Chatterjee,<sup>\*a</sup> Rafael Prados-Rosales,<sup>b</sup> Cindy Tan,<sup>a</sup> Boris Itin,<sup>c</sup> Arturo Casadevall,<sup>b</sup>  
and Ruth E. Stark<sup>\*a</sup>*

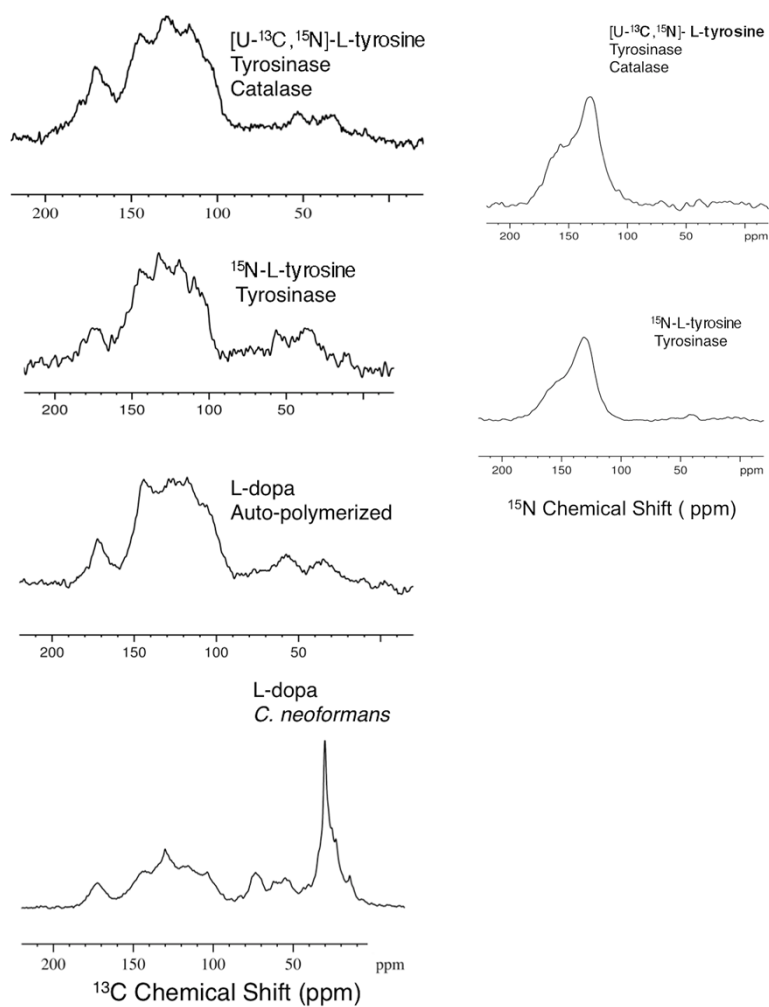

**Figure S1.** *Left:* Solid-state CPMAS  $^{13}\text{C}$  NMR spectra of melanins produced from amino acid and catecholamine precursors, obtained at a  $^1\text{H}$  operating frequency of 600 MHz and spinning rate of 15 kHz. From top to bottom (including number of transients): synthetic L-tyrosine melanin (tyrosinase with catalase, 1400; tyrosinase without catalase, 4096), L-dopa melanin (cell-free reaction, 4096); with *Cryptococcus neoformans* (CN), 21,000). *Right:* CPMAS  $^{15}\text{N}$  NMR spectra of melanins produced from amino acid precursors, obtained at  $^1\text{H}$  operating frequencies of 600 MHz and 750 MHz, spinning rate of 15 kHz. Top: synthetic L-tyrosine (tyrosinase with catalase, 4096). Bottom: tyrosinase without catalase, 512.

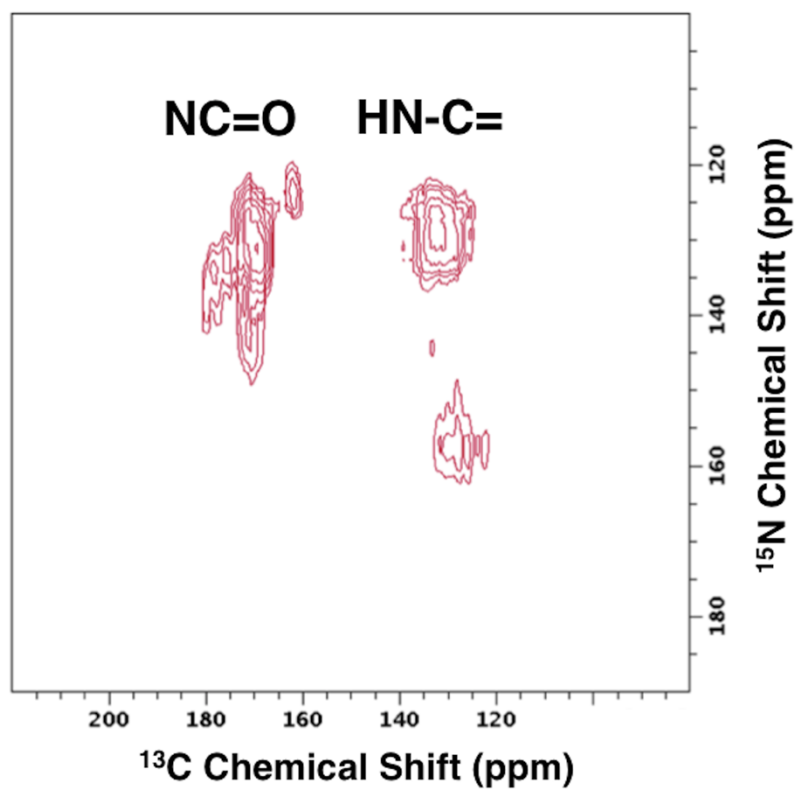

**Figure S2.** Two-dimensional  $^{13}\text{C}$ - $^{15}\text{N}$  Proton Assisted Insensitive Nuclei Cross Polarization (PAIN-CP) NMR contour diagram of synthetic  $[\text{U-}^{13}\text{C},^{15}\text{N}]$ -L-tyrosine melanin, obtained at a  $^1\text{H}$  operating frequency of 900 MHz and spinning rate of 20 kHz.

---

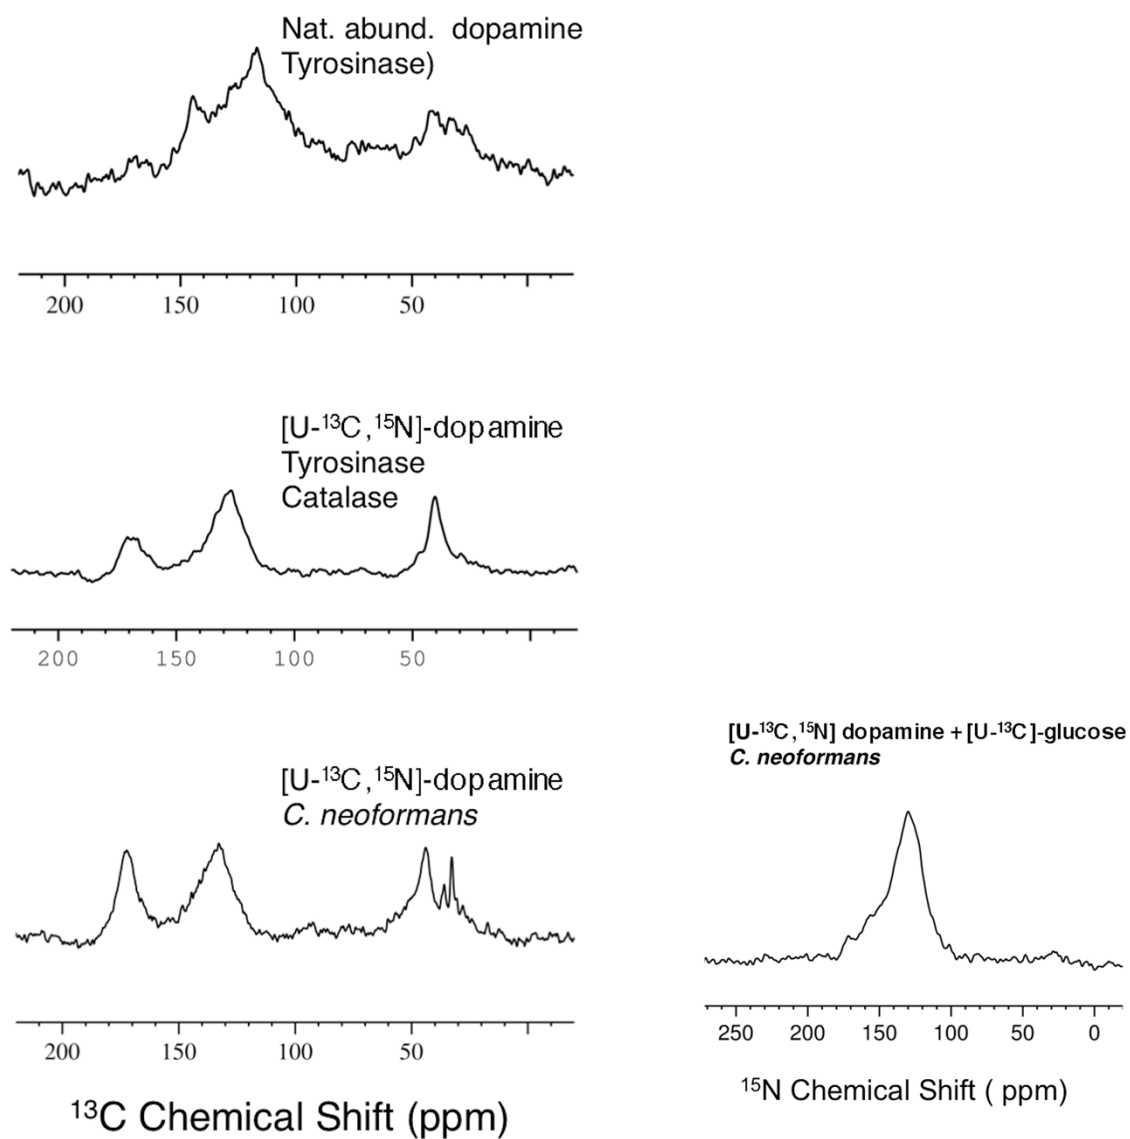

**Figure S3.** Left: Solid-state CPMAS <sup>13</sup>C NMR spectra of dopamine melanins produced in cell-free and fungal systems, obtained with a spinning rate of 15 kHz at two resonance frequencies. From top to bottom (including number of transients): tyrosinase-catalyzed synthesis without catalase (4096, 5 mg sample) and with catalase (~12000, ~2 mg sample) (600 MHz <sup>1</sup>H); *Cryptococcus neoformans* (CN) biosynthesis (1024, (750 MHz <sup>1</sup>H). Right: One-dimensional solid-state CPMAS <sup>15</sup>N NMR spectrum of CN dopamine melanin (10000, ~5mg) obtained at <sup>1</sup>H operating frequency of 750 MHz and a spinning rate of 15 kHz.
